# Supplementary material for: Hard-Rock Stability Analysis for Span Design in Entry-Type Excavations with Learning Classifiers
Source: Materials (Basel). 2016 Jun 29;9(7):531. doi: 10.3390/ma9070531 (PMC5456900; doi:10.3390/ma9070531)
Supplement: Supplementary file 1 [file materials-09-00531-s001.xlsx]

## Sheet: Hoja1
Number	RMR (%)	Span(m)	Stability
1	55	18.6	2		1 stable
2	77	12	1		2 potencially unstable
3	40	6.4	3		3 unstable
4	57	13	1
5	47	9.2	2
6	73	8	1
7	79	24	2
8	25	3.5	3
9	79	17	1
10	75	26	2
11	58	12	1
12	77	20	1
13	49	14	3
14	38	5	2
15	68	20	2
16	56	6	1
17	45	7	2
18	28	14	3
19	35	3.5	3
20	61	5.9	1
21	55	3.1	1
22	77	20	1
23	80	12	1
24	52	4.3	2
25	72	5	1
26	42	6	2
27	50	9	2
28	68	21	2
29	56	5.9	1
30	60	10	2
31	78	28	2
32	65	6.5	1
33	55	2	1
34	70	9.2	1
35	70	5	1
36	79	6.7	1
37	69	3.7	1
38	75	5	1
39	69	4	1
40	70	4.6	1
41	77	35	2
42	80	5	1
43	87	25	1
44	45	7	3
45	65	32	3
46	55	6.1	1
47	72	25	2
48	82	3.1	1
49	56	5	1
50	60	8.2	1
51	63	17	2
52	48	15	3
53	46	4.5	2
54	69	25	2
55	52	4.6	2
56	78	35	2
57	61	11	1
58	54	5	1
59	25	3.5	3
60	25	3.5	3
61	25	3.5	3
62	65	7	1
63	63	24	3
64	40	13.1	3
65	73	10	1
66	77	18	1
67	40	4.2	3
68	72	5.5	1
69	58	13	1
70	45	3.1	3
71	64	16	1
72	58	4.9	1
73	79	18	1
74	38	5	2
75	64	8.2	1
76	79	14	1
77	65	18	2
78	55	6.1	1
79	63	20	2
80	51	11.9	2
81	62	3	1
82	65	5.6	1
83	65	12	1
84	50	3.7	1
85	38	5	2
86	85	15	1
87	74	10.7	1
88	64	20	2
89	74	14	1
90	45	7	2
91	78	20	1
92	77	23	1
93	63	24	3
94	70	6	1
95	65	2.4	1
96	50	3.7	2
97	78	15	1
98	68	5.2	1
99	74	9.2	1
100	25	13	3
101	24	4.3	3
102	67	6.7	1
103	64	25	3
104	69	4	1
105	59	11	1
106	67	9	1
107	54	2.7	1
108	33	3.5	3
109	68	12	1
110	78	26	1
111	71	8	1
112	60	15	2
113	80	2	1
114	67	23	2
115	68	21	2
116	45	7	2
117	68	5.5	1
118	60	6	1
119	60	5	1
120	85	15	1
121	75	3.1	1
122	40	7	2
123	65	15	2
124	62	9.5	1
125	25	6	3
126	60	2.5	1
127	62	4.9	1
128	75	26	2
129	60	4.6	1
130	81	41	3
131	71	5	1
132	82	2.7	1
133	49	12	2
134	69	3.1	1
135	68	17	2
136	25	3.5	3
137	62	12	1
138	81	9	1
139	67	10	1
140	67	6	1
141	69	20	1
142	87	19	1
143	50	9	2
144	43	7	2
145	64	35	2
146	77	20	1
147	50	5.7	2
148	63	24	3
149	78	39	2
150	78	20	1
151	54	2	1
152	70	14	1
153	38	5	2
154	55	4.6	1
155	45	3.1	3
156	58	8	1
157	67	3.8	1
158	63	10	1
159	80	20	1
160	77	25	2
161	43	10.1	2
162	72	23	2
163	64	3.7	1
164	79	20	1
165	79	25	1
166	50	8.2	2
167	78	18	1
168	78	28	2
169	80	6.1	1
170	74	2.7	1
171	47	2.7	1
172	65	18	2
173	75	15	1
174	44	6	2
175	54	9	3
176	67	12	1
177	81	5.8	1
178	78	15	1
179	60	9.2	1
180	57	12.2	2
181	73	20	1
182	72	12	1
183	62	5.5	1
184	29	4	3
185	40	4	2
186	52	7.6	2
187	40	4.6	2
188	70	11	1
189	85	14	1
190	55	4.9	2
191	69	4.6	1
192	62	22	3
193	76	24	1
194	69	5	1
195	70	11	1
196	48	20	3
197	79	25	1
198	73	25	2
199	65	6.1	1
200	72	17	1
201	53	10	2
202	76	6	1
203	55	4.9	3
204	66	12.5	1
205	64	25	3
206	55	9.2	2
207	40	12.2	3
208	66	16	1
209	53	12.2	3
210	45	4.8	1
211	57	14	1
212	68	20	2
213	80	6	1
214	64	4.1	1
215	48	15	3
216	70	9.2	1
217	63	24	3
218	72	8	1
219	75	21	2
220	70	6	1
221	70	6.1	1
222	65	8	1
223	55	11	2
224	56	5	1
225	52	6.1	1
226	76	24	1
227	67	25	3
228	68	6	1
229	63	20	2
230	70	12	1
231	67	21	1
232	60	20	3
233	43	7	2
234	78	28	2
235	80	20	1
236	38	5	2
237	58	10	1
238	70	30	3
239	55	5	1
240	67	2	1
241	40	7	2
242	58	7.3	1
243	55	6.1	2
244	79	25	1
245	80	18	1
246	30	3	3
247	73	16	1
248	75	18	1
249	79	31	2
250	62	8.5	2
251	73	20	1
252	67	10.7	1
253	77	25	1
254	28	15	3
255	40	4	2
256	50	3	1
257	57	3.4	1
258	60	1.8	1
259	60	4	1
260	55	7.9	2
261	46	8	2
262	42	5	2
263	67	9	1
264	57	3.1	1
265	70	5	1
266	66	12.2	1
267	50	5	2
268	65	7.6	1
269	83	15	1
270	45	2.4	1
271	82	14	1
272	48	15	3
273	54	10	3
274	64	3.7	1
275	71	6.2	1
276	80	6.7	1
277	66	17	2
278	66	1.8	1
279	78	35	2
280	55	7.9	2
281	64	2.7	1
282	66	2.4	1
283	62	4	1
284	54	10	2
285	65	5.2	1
286	42	6	2
287	52	7.3	1
288	60	3.8	1
289	77	12	1
290	70	11	1
291	54	6.1	1
292	77	35	3
293	48	7	2
294	78	25	1
295	69	7.3	1
296	63	7	1
297	73	20	1
298	77	16	1
299	60	2.5	1
300	67	18	2
301	50	3.5	1
302	65	13	1
303	63	24	3
304	70	8	1
305	60	8	1
306	52	6	2
307	78	35	2
308	70	4.6	1
309	70	35	3
310	79	32	2
311	70	7	1
312	68	8.2	1
313	63	24	3
314	63	24	3
315	72	24	2
316	70	20	1
317	60	11	1
318	46	2.7	2
319	80	19	1
320	70	2.4	1
321	79	18	1
322	47	2.7	2
323	66	22	2
324	70	2.4	1
325	72	5	1
326	87	15	1
327	60	22	3
328	74	13	1
329	69	6.7	1
330	67	30	3
331	69	4.9	1
332	78	39	2
333	73	20	1
334	64	17	2
335	45	3.1	1
336	67	9	1
337	69	25	2
338	60	7.3	2
339	70	40	3
340	77	16	1
341	72	16	1
342	45	9.2	2
343	63	5.5	1
344	87	15	1
345	78	15	1
346	55	12	2
347	80	12	1
348	70	20	1
349	78	18	1
350	51	3.8	1
351	67	25	3
352	77	22	1
353	70	2	1
354	49	4.4	1
355	65	15	2
356	54	10	2
357	63	3.7	1
358	79	6.1	1
359	70	11.9	1
360	65	5.2	1
361	57	6.4	1
362	74	6.1	1
363	66	17	2
364	85	15	1
365	63	8.5	1
366	51	6	2
367	61	10	1
368	68	16	2
369	77	20	1
370	78	19	1
371	70	32	3
372	49	8	2
373	64	15	1
374	70	11	1
375	72	10.4	1
376	51	13	3
377	68	2.4	1
378	63	24	3
379	78	19	1
380	64	11	1
381	71	10	1
382	40	8	3
383	69	25	2
384	50	6.1	1
385	67	25	3
386	58	10	1
387	65	5	1
388	67	20	2
389	69	5.5	1
390	69	15	1
391	81	23	1
392	69	4	1
393	75	5.4	1
394	63	17	1
395	85	16	1
396	55	7	1
397	61	6.4	1
398	77	25	1
399	43	6	2
